# Supplementary material
Source: HighWire-hosted journal article supplement (https://erj.ersjournals.com/content/59/4/2102787)

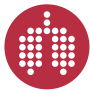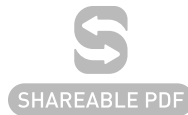

# Practices of therapeutic drug monitoring in tuberculosis: an international survey

Ioana Margineanu <sup>1</sup>, Onno Akkerman<sup>2,3</sup>, Dario Cattaneo<sup>4,12</sup>, Delia Goletti <sup>5,12</sup>, Deborah J.E. Marriott<sup>6,12</sup>, Giovanni Battista Migliori <sup>7,12</sup>, Fuad Mirzayev<sup>8,12</sup>, Charles A. Peloquin<sup>9,12</sup>, Ymkje Stienstra<sup>10</sup> and Jan-Willem Alffenaar<sup>11</sup>

<sup>1</sup>Dept of Clinical Pharmacy and Pharmacology, Rijksuniversiteit Groningen, University Medical Centrum Groningen, Groningen, The Netherlands. <sup>2</sup>University of Groningen, University Medical Centrum Groningen, Dept of Pulmonary Diseases and Tuberculosis, Groningen, The Netherlands. <sup>3</sup>University Of Groningen, University Medical Centrum Groningen, TB center Beatrixoord, Groningen, The Netherlands. <sup>4</sup>Unit of Clinical Pharmacology, ASST Fatebenefratelli Sacco University Hospital, Milan, Italy. <sup>5</sup>Translational Research Unit, National Institute for Infectious Diseases (INMI), Rome, Italy. <sup>6</sup>Dept of Clinical Microbiology and Infectious Diseases, St Vincent's Hospital, Sydney, Australia. <sup>7</sup>Istituto Clinici Scientifici Maugeri IRCCS, Tradate, Italy. <sup>8</sup>Global TB Programme, World Health Organization, Geneva, Switzerland. <sup>9</sup>University of Florida, College of Pharmacy and Emerging Pathogens Institute, Gainesville, FL, USA. <sup>10</sup>Dept of Internal Medicine, Rijksuniversiteit Groningen, University Medical Centrum Groningen, Groningen, The Netherlands. <sup>11</sup>School of Pharmacy, Faculty of Medicine and Health, University of Sydney, Sydney, Australia. <sup>12</sup>In alphabetical order.

Corresponding author: Ioana Margineanu ([i.s.margineanu@umcg.nl](mailto:i.s.margineanu@umcg.nl))

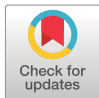

Shareable abstract (@ERSpublications)

**Survey responses indicate that there is concern surrounding cost-effectiveness and the resources available in different settings to implement therapeutic drug monitoring in TB. Robust research is needed to better inform of the potential long-term benefits.** <https://bit.ly/34PFSfd>

**Cite this article as:** Margineanu I, Akkerman O, Cattaneo D, *et al.* Practices of therapeutic drug monitoring in tuberculosis: an international survey. *Eur Respir J* 2022; 59: 2102787 [DOI: 10.1183/13993003.02787-2021].

This single-page version can be shared freely online.

Copyright ©The authors 2022.

This version is distributed under the terms of the Creative Commons Attribution Non-Commercial Licence 4.0. For commercial reproduction rights and permissions contact [permissions@ersnet.org](mailto:permissions@ersnet.org)

Received: 2 Nov 2021  
Accepted: 2 Jan 2022

*To the Editor:*

Tuberculosis (TB) is still one of the top 10 causes of death in low and lower-middle income countries [1]. TB's long and complex treatment, side-effects, and development of resistant bacteria compromise treatment success. To improve treatment outcomes, therapeutic drug monitoring (TDM) has been included in TB treatment guidelines [2–4] to be considered for specific situations in which there is documented or expected poor response to treatment, drug toxicity, or a lower drug concentration. Several strategies for implementation of TDM for programmatic use have been proposed to overcome barriers to widespread use of TDM [5, 6], including more accessible techniques such as dried blood spot analysis or saliva and urine testing [7], but uptake in programmatic care is still limited [8].

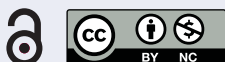

Supplement: inline-supplementary-material-1 [file inline-supplementary-material-1.pdf]
